# Supplementary material for: Visualization of a neurotropic flavivirus infection in mouse reveals unique viscerotropism controlled by host type I interferon signaling
Source: PubMed Central journal article supplement — Theranostics. 2017 Feb 12;7(4):912–25. doi: 10.7150/thno.16615 (PMC5381253; doi:10.7150/thno.16615), 2017-02-12
Supplement: thnov07p0912s1.pdf [file thnov07p0912s1.pdf]

1  
2  
3  
4  
5  
6  
7  
8  
9

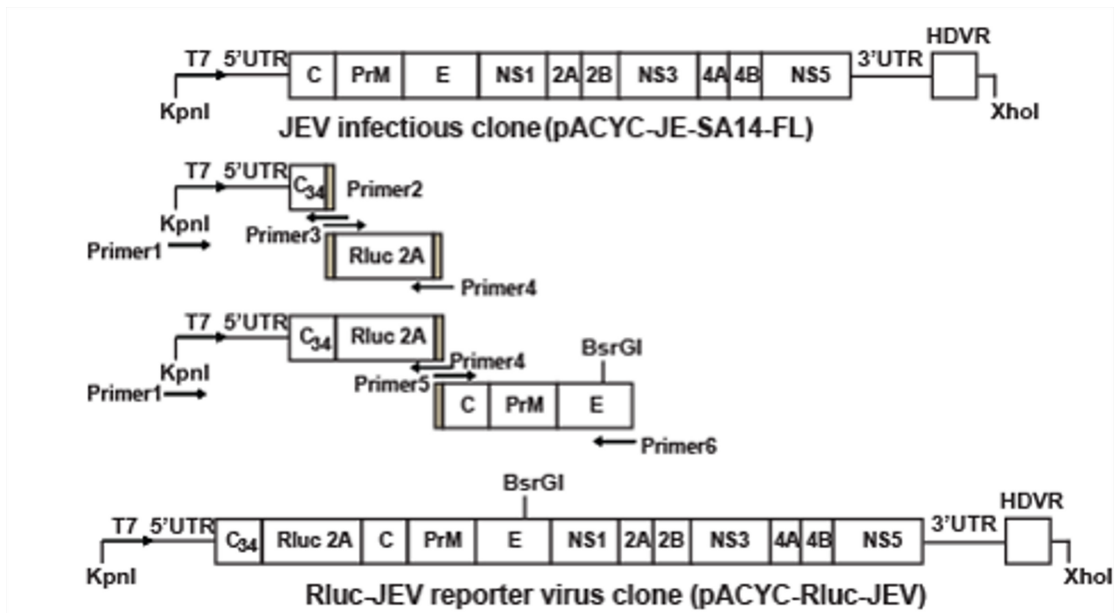

10 **Figure S1. Schematic of construction of the genomic-length Rluc-JEV cDNA**  
11 **clone.** Strategy for the construction of the infectious cDNA clone of the reporter virus.

12  
13  
14  
15  
16  
17  
18  
19  
20  
21  
22

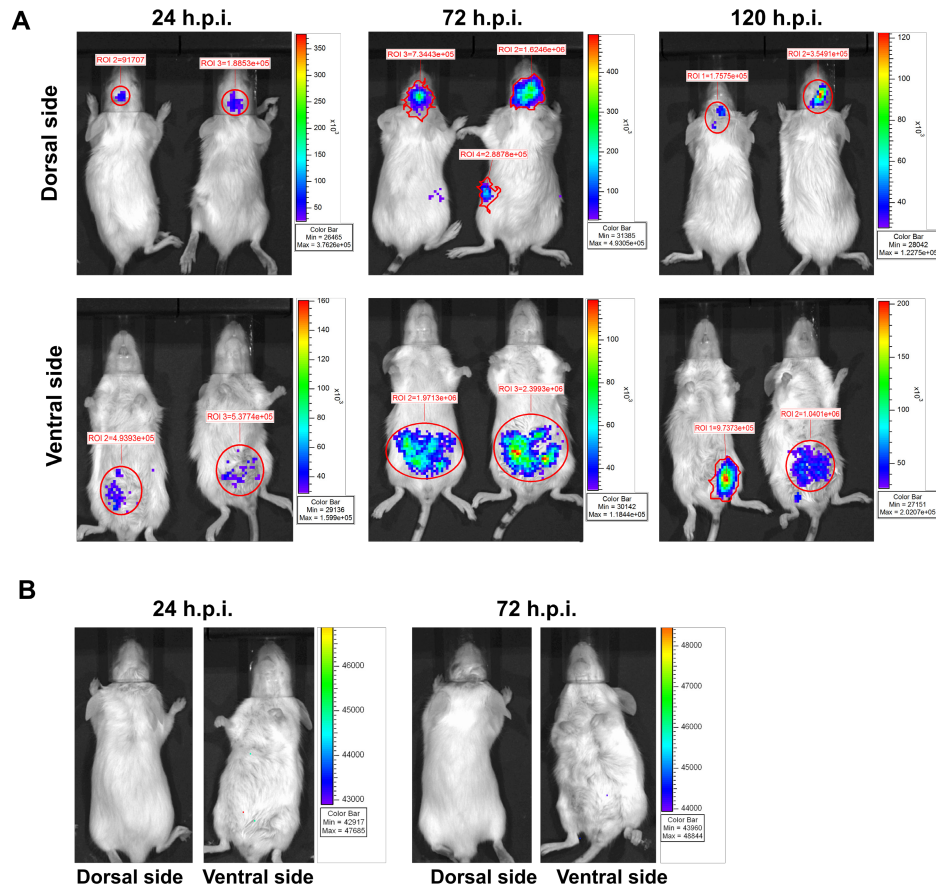

23 **Figure S2. Noninvasive imaging to monitor JEV replication in BALB/c mice.** BLI  
24 of JEV infection in BALB/c mice. Groups of 3-4-week-old BALB/c mice were  
25 inoculated i.p. with  $10^7$  PFU of Rluc-JEV (A) or parental JEV (B). Photon flux was  
26 quantified from ROI analysis of the dorsal and ventral side.

27  
28  
29  
30  
31  
32  
33  
34  
35  
36  
37  
38  
39  
40  
41  
42  
43  
44

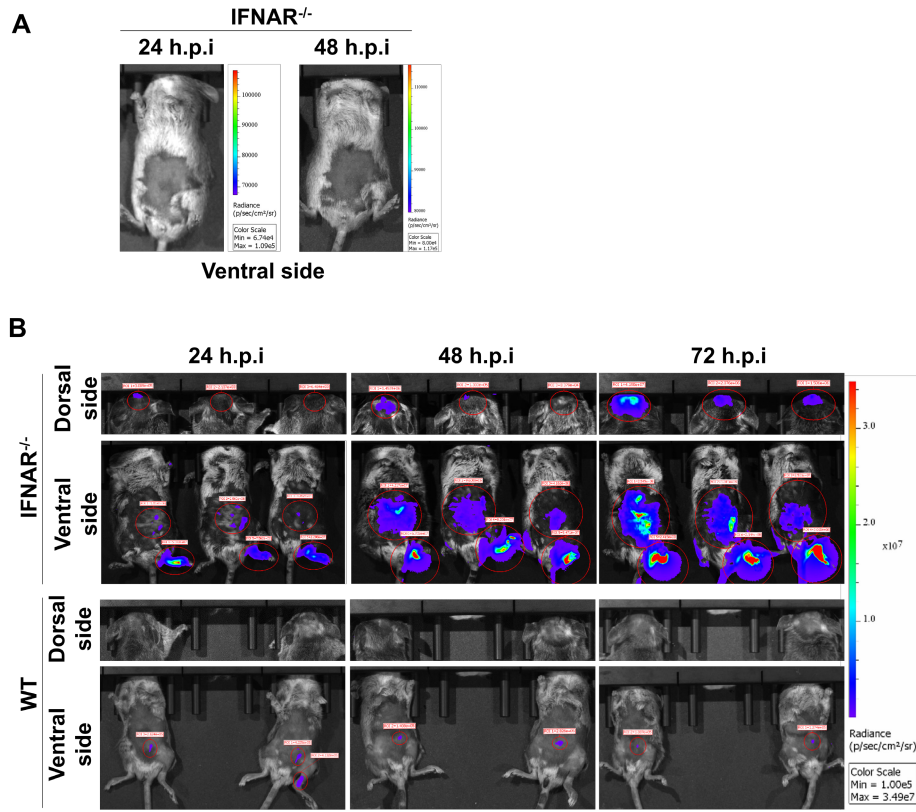

45 **Figure S3. Noninvasive imaging to monitor JEV replication in IFNAR<sup>-/-</sup> and WT**  
46 **mice.** Groups of 3-4-week-old IFNAR<sup>-/-</sup> and WT mice were inoculated via footpad  
47 with 10<sup>6</sup> PFU of parental JEV (A) or Rluc-JEV (B). Photon flux was quantified from  
48 ROI analysis of the dorsal or ventral side.

49

50

51

52

53

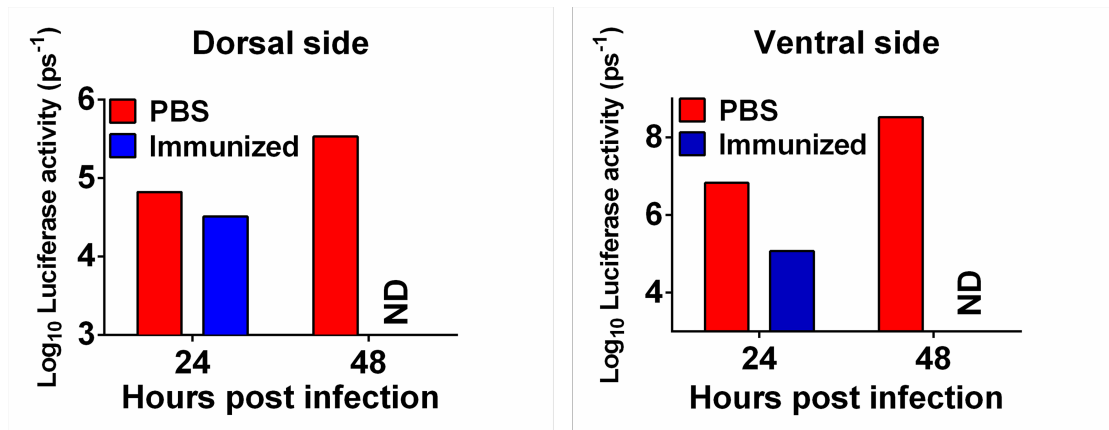

54 **Figure S4. BLI of the immunized IFNAR<sup>-/-</sup> mice challenged with Rluc-JEV.**

55 Group of IFNAR<sup>-/-</sup> mice were immunized and challenged as described in legend to

56 Fig. 8. BLI of the challenged mice was performed at indicated time points.

57

58

59 Table S1 Oligonucleotide primers used for construction of the reporter virus

60

---

| Primer   |                    | Sequence(5'-3')                                             |
|----------|--------------------|-------------------------------------------------------------|
| Primer 1 | Kpn1 (T7)-F        | CGCTTATAA <u>agg</u> taC <u>TAATAC</u> GA <sup>CT</sup> CAC |
| Primer 2 | SA14-C34-Rluc-2A-R | CTTGGAAAGCCATtactaccctcttca <sup>ct</sup> cccac             |
| Primer 3 | SA14-C34-Rluc-2A-F | gagggtagtaATGGCTTCCAAGGTGTACGAC<br>C                        |
| Primer 4 | Rluc-2A-SA14-C-R   | ggtttttagtCATTGGCCCAGGGTTGGACTCG<br>AC                      |
| Primer 5 | Rluc-2A-SA14-C-F   | CCCTGGGCCAATGactaaaaaaccaggagg                              |
| Primer 6 | JEV-SA14-2477-R    | AGCATGCACATTGGTCGCTAAG                                      |

---

61

62

63

64
